# Supplementary material
Source: PubMed Central journal article supplement (PMC7308052)
Supplement: jciinsight-5-138274-s088.pdf [file jciinsight-5-138274-s088.pdf]

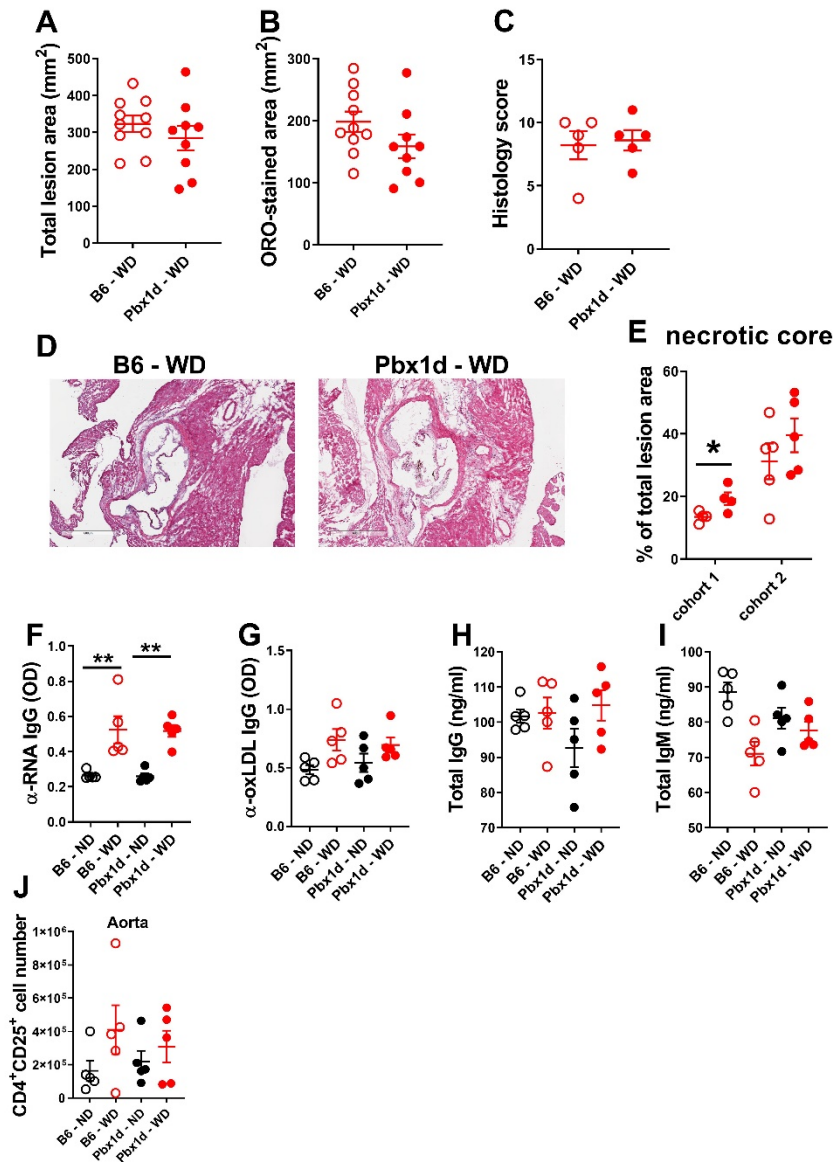

**Sup. Fig. 1. Analysis of aortic root lesions and serum antibodies in the chimeric Ldlr KO mice.** Quantification of the total lesions (**A**) and ORO-stained lesions (**B**). (**C**) Aortic root histological scores in chimeric mice fed with WD; (**D**) Representative H&E-stained sections and necrotic score (**E**). Terminal serum anti-RNA IgG (**F**) Necrotic Anti-oxidized LDL IgG (**G**), total IgG (**H**) and IgM (**I**). Total CD4<sup>+</sup> cells (**J**) and CD4<sup>+</sup>CD25<sup>+</sup> cells (**K**) in the aorta. Means  $\pm$  S.E.M compared with one-way ANOVA with Tukey's multiple comparisons tests. \*\*  $P < 0.01$ . Each symbol represents a mouse.

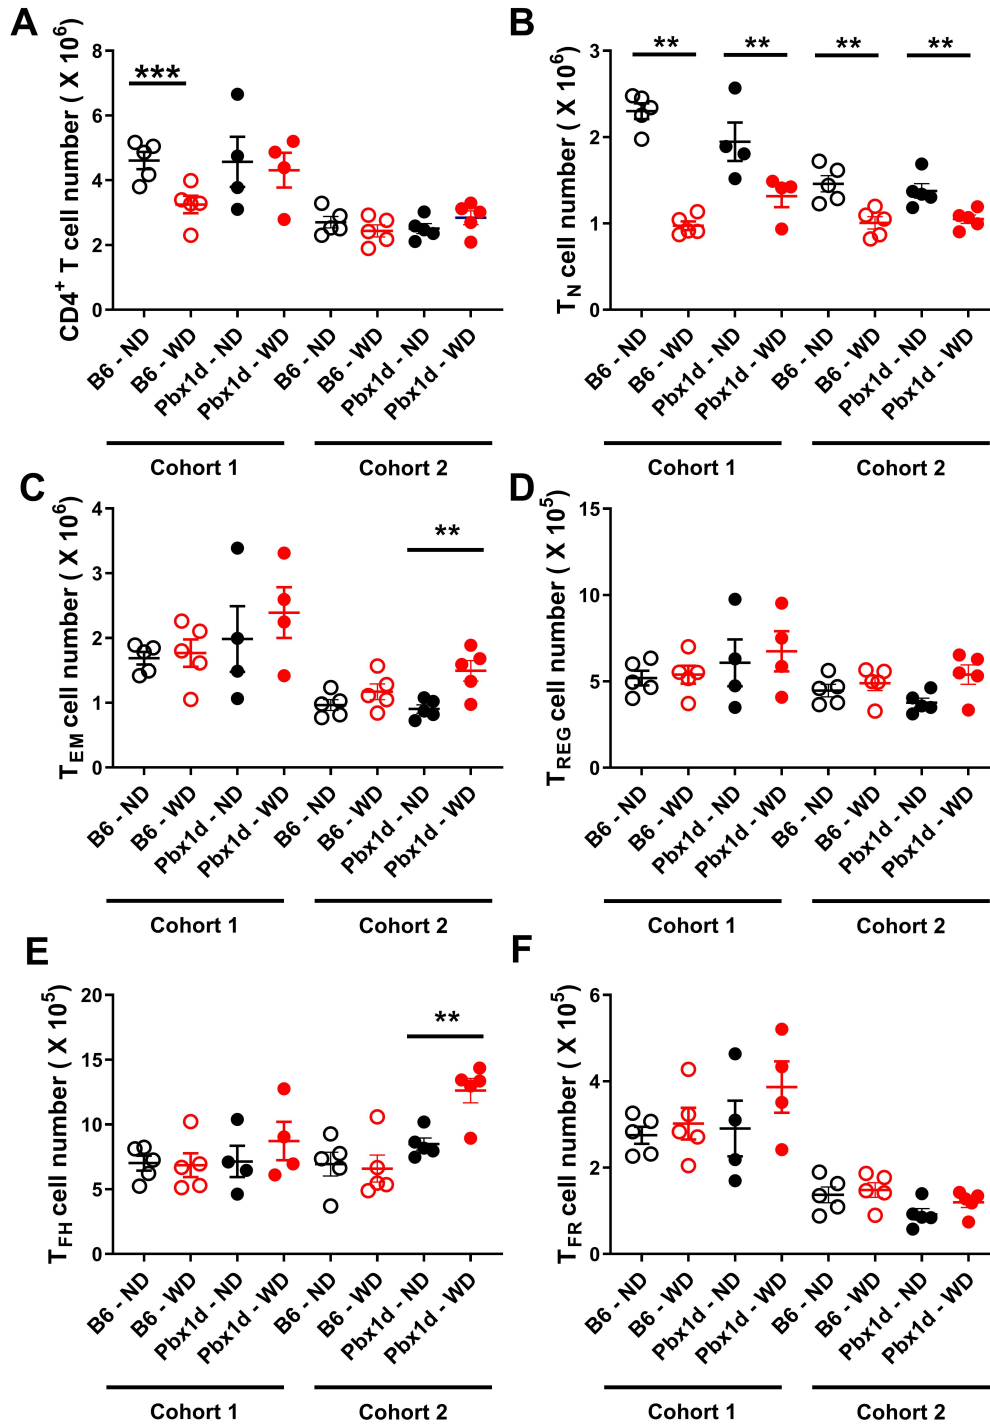

Sup. Fig. 2. Numbers of CD4<sup>+</sup> T cell subsets in Ldlr KO chimeric mice. Total CD4<sup>+</sup> T cells (A), CD4<sup>+</sup>CD62L<sup>+</sup>CD44<sup>-</sup> naïve T (T<sub>N</sub>) cells (B), CD4<sup>+</sup>CD62L<sup>-</sup>CD44<sup>+</sup> effector memory T (T<sub>EM</sub>) cells (C), CD4<sup>+</sup>Foxp3<sup>+</sup> regulatory T (T<sub>REG</sub>) cells (D), CXCR5<sup>+</sup>PD-1<sup>+</sup>Bcl6<sup>+</sup>Foxp3<sup>-</sup> T<sub>FH</sub> (E) and CXCR5<sup>+</sup>PD-1<sup>+</sup>Bcl6<sup>+</sup>Foxp3<sup>+</sup> T<sub>FR</sub> (F) cells in B6 and Pbx1d chimeric mice fed with ND or WD diets from 2 independent cohorts. Means ± S.E.M compared with one-way ANOVA with Tukey's multiple comparisons tests. \*\* P < 0.01, \*\*\* P < 0.001. Each symbol represents a mouse.

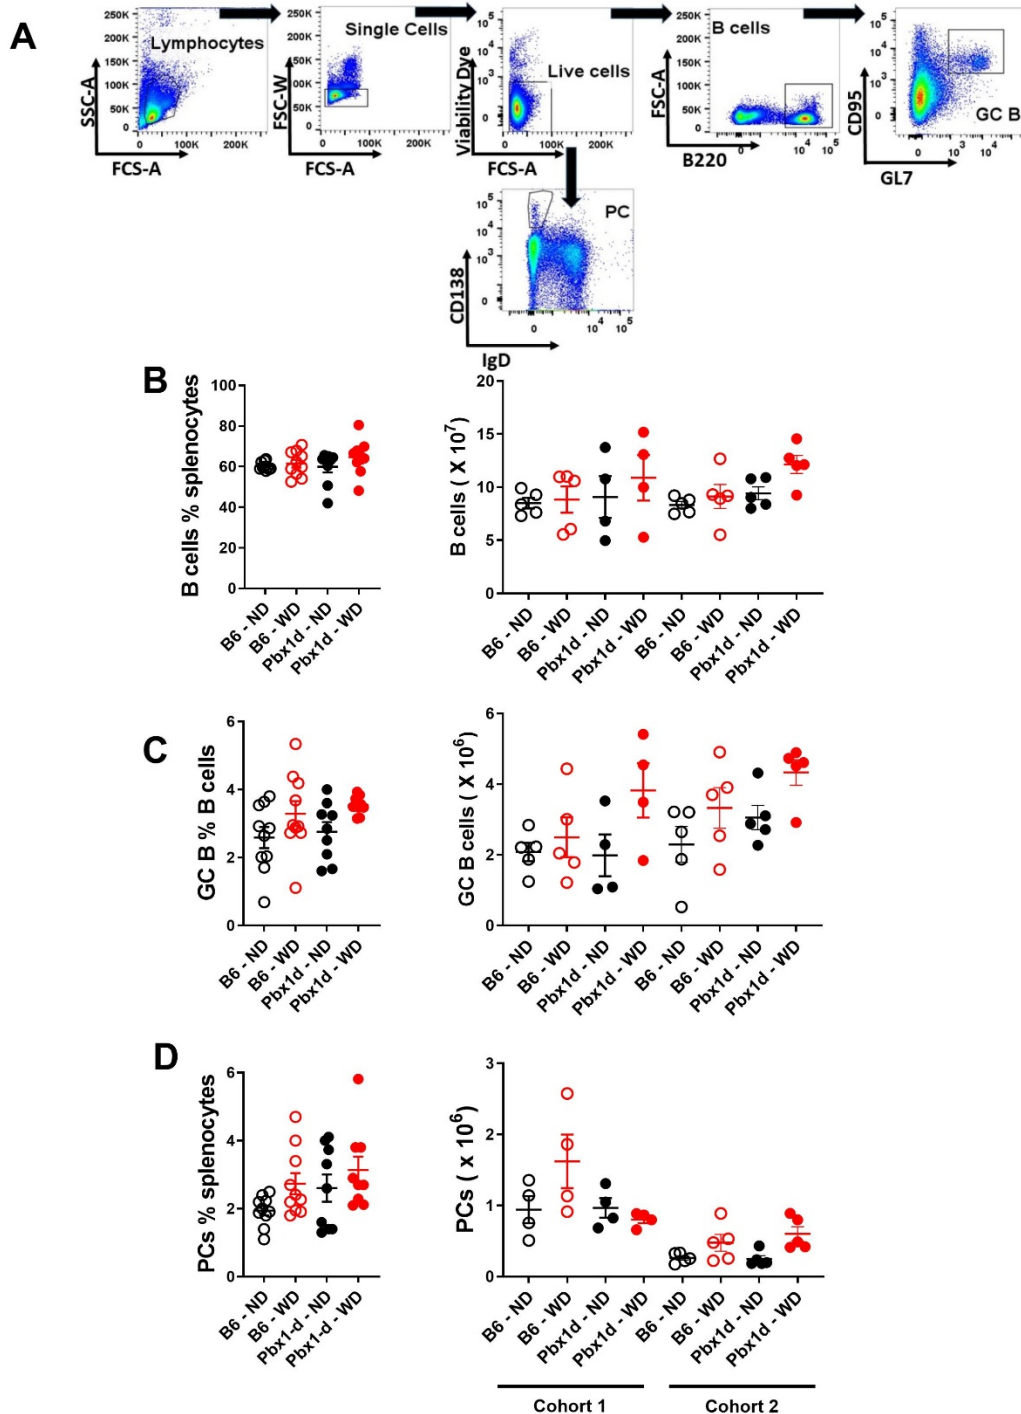

**Sup. Fig. 3. B cells in *Ldlr* KO chimeric mice.** (A) Gating strategy. Frequency and cell number of total B cells (B), CD95<sup>+</sup>GL7<sup>+</sup> GC B cells (C) and CD138<sup>+</sup>IgD<sup>-</sup> plasma cells (D) in the spleen of B6 and Pbx1d chimeric mice fed with ND or WD diets from 2 independent cohorts. Means  $\pm$  S.E.M compared. Each symbol represents a mouse.

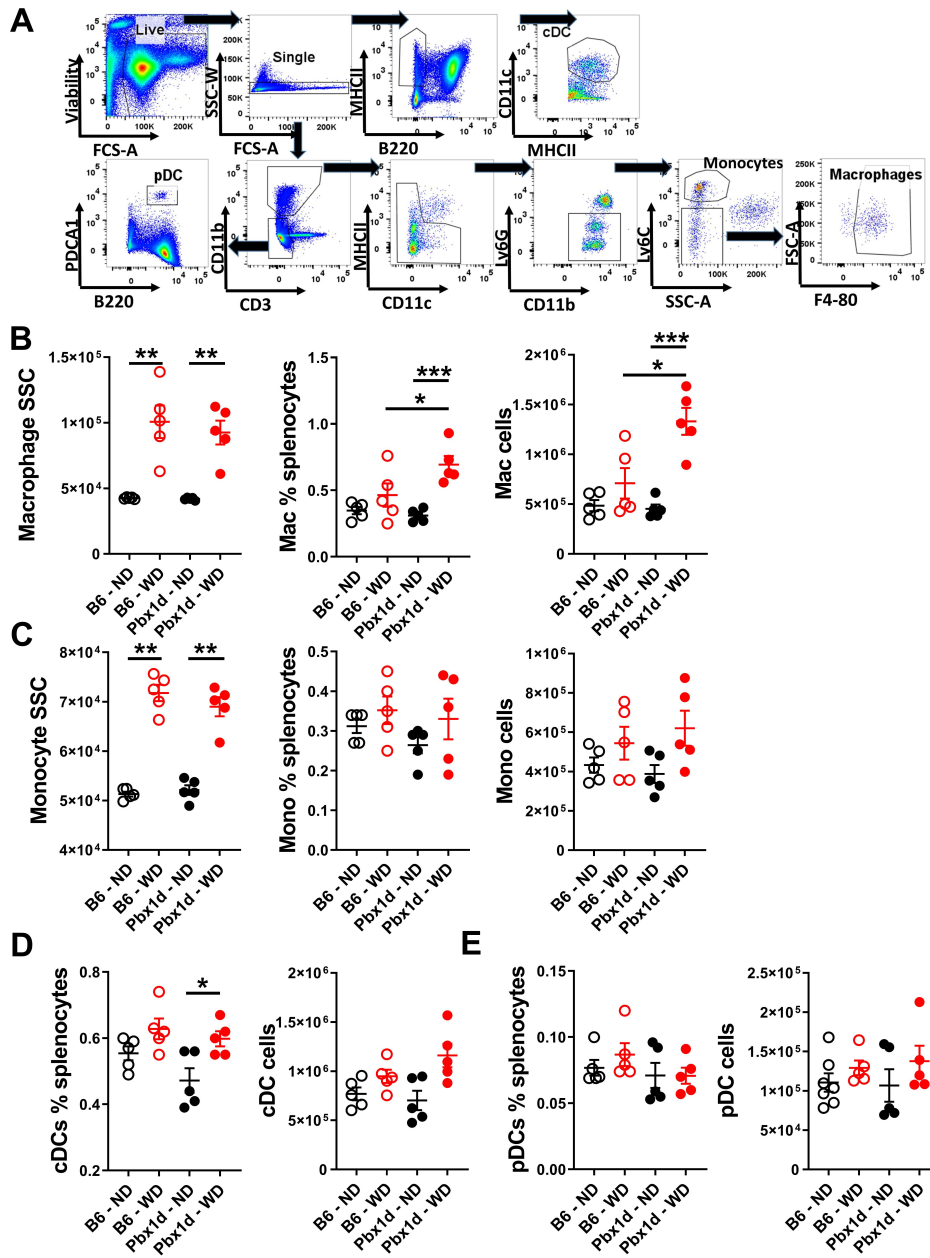

**Sup. Fig. 4. Myeloid cells in the spleen of Ldlr KO chimeric mice.** (A) Gating strategy. Side scatter, frequency and cell number of Ly6C<sup>low</sup>CD11b<sup>+</sup>F4-80<sup>+</sup> macrophages (B) and Ly6C<sup>hi</sup>CD11b<sup>+</sup>Ly6G<sup>low</sup> monocytes (C). Frequency and cell number of B220<sup>+</sup>CD11c<sup>+</sup>MHCII<sup>+</sup> conventional DC (cDCs) (D) and CD3<sup>-</sup>CD11b<sup>+</sup>B220<sup>+</sup>PDCA1<sup>+</sup> pDCs (E) in B6 and Pbx1d chimeric mice fed with ND or WD diets. Means ± S.E.M compared with one-way ANOVA with Tukey's multiple comparisons tests. P < 0.05, \*\* P < 0.01, \*\*\* P < 0.001. Each symbol represents a mouse.
